# Supplementary material for: Fragment optimization for GPCRs by molecular dynamics free energy calculations: Probing druggable subpockets of the A2A adenosine receptor binding site
Source: PubMed Central journal article supplement (PMC5526870; doi:10.1038/s41598-017-04905-0), 2017-07-25
Supplement: 41598_2017_4905_MOESM1_ESM.pdf [file 41598_2017_4905_MOESM1_ESM.pdf]

## Supplementary information:

### **Fragment optimization for GPCRs by molecular dynamics free energy calculations: Probing druggable subpockets of the A<sub>2A</sub> adenosine receptor binding site**

Pierre Matricon<sup>1,§</sup>, Anirudh Ranganathan<sup>2,§</sup>, Eugene Warnick<sup>3</sup>, Zhan-Guo Gao<sup>3</sup>, Axel Rudling<sup>2</sup>, Catia Lambertucci<sup>4</sup>, Gabriella Marucci<sup>4</sup>, Aitakin Ezzati<sup>2</sup>, Mariama Jaiteh<sup>1</sup>, Diego Dal Ben<sup>4</sup>, Kenneth A. Jacobson<sup>3</sup>, and Jens Carlsson<sup>1,\*</sup>

<sup>1</sup>Science for Life Laboratory, Department of Cell and Molecular Biology, Uppsala University, SE-75124 Uppsala, Sweden.

<sup>2</sup>Science for Life Laboratory, Department of Biochemistry and Biophysics, Stockholm University, SE-106 91 Stockholm, Sweden.

<sup>3</sup>Molecular Recognition Section, Laboratory of Bioorganic Chemistry, National Institute of Diabetes and Digestive and Kidney Diseases, National Institutes of Health, Bethesda, Maryland 20892, United States.

<sup>4</sup>Scuola di Scienze del Farmaco e dei Prodotti della Salute, Università degli Studi di Camerino, Via S. Agostino 1, 62032 Camerino (MC), Italy.

§ These authors contributed equally to this work.

\* Corresponding author

**Supplementary Table S1.** Binding data for compounds **1-23**.

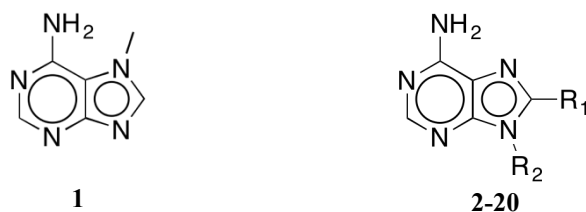

| Compounds | R <sub>1</sub>                      | R <sub>2</sub>                                    | K <sub>i</sub> (μM)                            |
|-----------|-------------------------------------|---------------------------------------------------|------------------------------------------------|
| <b>1</b>  | -                                   | -                                                 | >100 <sup>a</sup>                              |
| <b>2</b>  | H                                   | CH <sub>3</sub>                                   | 6.9 (3.7-13) <sup>a</sup>                      |
| <b>3</b>  | Br                                  | CH <sub>3</sub>                                   | 0.12 (0.076-0.20) <sup>a</sup>                 |
| <b>4</b>  | Br                                  | H                                                 | 3.2 (1.3-7.9) <sup>a</sup>                     |
| <b>5</b>  | Br                                  | CH <sub>3</sub> CH <sub>2</sub>                   | 0.052 (0.024-0.11) <sup>a</sup>                |
| <b>6</b>  | Br                                  | HOCH <sub>2</sub> CH <sub>2</sub>                 | 0.62 (0.54-0.71) <sup>a</sup>                  |
| <b>7</b>  | Br                                  | CH <sub>3</sub> CH <sub>2</sub> CH <sub>2</sub>   | 0.30 (0.26-0.35) <sup>a</sup>                  |
| <b>8</b>  | Br                                  | (CH <sub>3</sub> ) <sub>2</sub> CHCH <sub>2</sub> | 6.0 (3.7-9.8) <sup>a</sup>                     |
| <b>9</b>  | H                                   | CH <sub>3</sub> CH <sub>2</sub>                   | 2.2 (1.4-3.5) <sup>a</sup>                     |
| <b>10</b> | H                                   | HOCH <sub>2</sub> CH <sub>2</sub>                 | 11 (6.5-18) <sup>a</sup>                       |
| <b>11</b> | H                                   | (CH <sub>3</sub> ) <sub>2</sub> CHCH <sub>2</sub> | >100 <sup>a</sup>                              |
| <b>12</b> | H                                   | HOCH <sub>2</sub> CH <sub>2</sub> CH <sub>2</sub> | 3.9 (3.4-4.5) <sup>a</sup>                     |
| <b>13</b> | H                                   | CH <sub>3</sub> CH <sub>2</sub> CH <sub>2</sub>   | 9.6 (5.8-16) <sup>a</sup>                      |
| <b>14</b> | Br                                  | cC <sub>5</sub> H <sub>9</sub>                    | 1.9 (1.6-2.3) <sup>a</sup>                     |
| <b>15</b> | H                                   | cC <sub>5</sub> H <sub>9</sub>                    | 1.8 (0.68-4.6) <sup>a</sup>                    |
| <b>16</b> | Br                                  | CH <sub>2</sub> CHCH <sub>2</sub> CH <sub>2</sub> | 1.6 (1.4-1.9) <sup>a</sup>                     |
| <b>17</b> | H                                   | CH <sub>2</sub> CHCH <sub>2</sub> CH <sub>2</sub> | 8.5 (5.0-15) <sup>a</sup>                      |
| <b>18</b> | CH <sub>3</sub>                     | CH <sub>3</sub> CH <sub>2</sub>                   | 0.218 ± 0.061 <sup>c</sup>                     |
| <b>19</b> | furyl                               | CH <sub>3</sub> CH <sub>2</sub>                   | 0.004 (0.003-0.005) <sup>b</sup>               |
| <b>20</b> | HO                                  | CH <sub>3</sub> CH <sub>2</sub>                   | 1.144 ± 0.290 <sup>c</sup>                     |
| <b>21</b> | CH <sub>3</sub> O                   | CH <sub>3</sub> CH <sub>2</sub>                   | 0.027 ± 0.000 <sup>c</sup>                     |
| <b>22</b> | CH <sub>3</sub> CH <sub>2</sub> O   | CH <sub>3</sub> CH <sub>2</sub>                   | 0.046 (0.024-0.091) <sup>b</sup>               |
| <b>23</b> | (CH <sub>3</sub> ) <sub>2</sub> CHO | CH <sub>3</sub> CH <sub>2</sub>                   | >100 <sup>b</sup> / 0.095 ± 0.049 <sup>c</sup> |

<sup>a</sup>K<sub>i</sub> value from Lambertucci *et al.*<sup>1</sup>

<sup>b</sup>K<sub>i</sub> value from Volpini *et al.*<sup>2</sup>

<sup>c</sup>Displacement of specific [<sup>3</sup>H]NECA binding at human A<sub>2A</sub>AR expressed in CHO cells measured in this work. Data is expressed as geometric means with 95% confidence limits (n=3-6).

**Supplementary Table S2.** Experimental data for compounds **25-36**. Radioligand binding assays were performed using membranes of mammalian cells overexpressing one AR subtype.

| Compounds | K <sub>i</sub> (μM) or % inhibition at 300 μM (n=3) <sup>a</sup> |                |                |
|-----------|------------------------------------------------------------------|----------------|----------------|
|           | A <sub>2A</sub>                                                  | A <sub>1</sub> | A <sub>3</sub> |
| <b>25</b> | 34 ± 1%                                                          | 27 ± 4%        | 39 ± 2%        |
| <b>26</b> | 78.5 ± 2.5                                                       | 44 ± 4%        | 50 ± 4%        |
| <b>27</b> | 20.0 ± 1.5                                                       | 97.3 ± 3.5     | 119 ± 42       |
| <b>28</b> | 17 ± 4%                                                          | 22 ± 6%        | 153 ± 31       |
| <b>29</b> | 31 ± 3%                                                          | 38 ± 6%        | 44 ± 4%        |
| <b>30</b> | 49 ± 1%                                                          | 97.2 ± 22.5    | 110 ± 17       |
| <b>31</b> | 223 ± 17                                                         | 50.1 ± 22.6    | 102 ± 32       |
| <b>32</b> | 79.1 ± 15.2                                                      | 11.2 ± 2.4     | 0.81 ± 0.17    |
| <b>33</b> | 10.7 ± 2.3                                                       | 17 ± 1.2       | 2.3 ± 0.5      |
| <b>34</b> | 11.6 ± 1.2                                                       | 8.4 ± 0.9      | 1.1 ± 0.2      |
| <b>35</b> | 48.6 ± 2.6                                                       | 17.8 ± 1.7     | 2.9 ± 0.4      |
| <b>36</b> | 1.8 ± 0.05                                                       | 7.8 ± 0.5      | 1.0 ± 0.2      |

<sup>a</sup>Data are expressed as mean ± standard error resulting from three independent experiments.

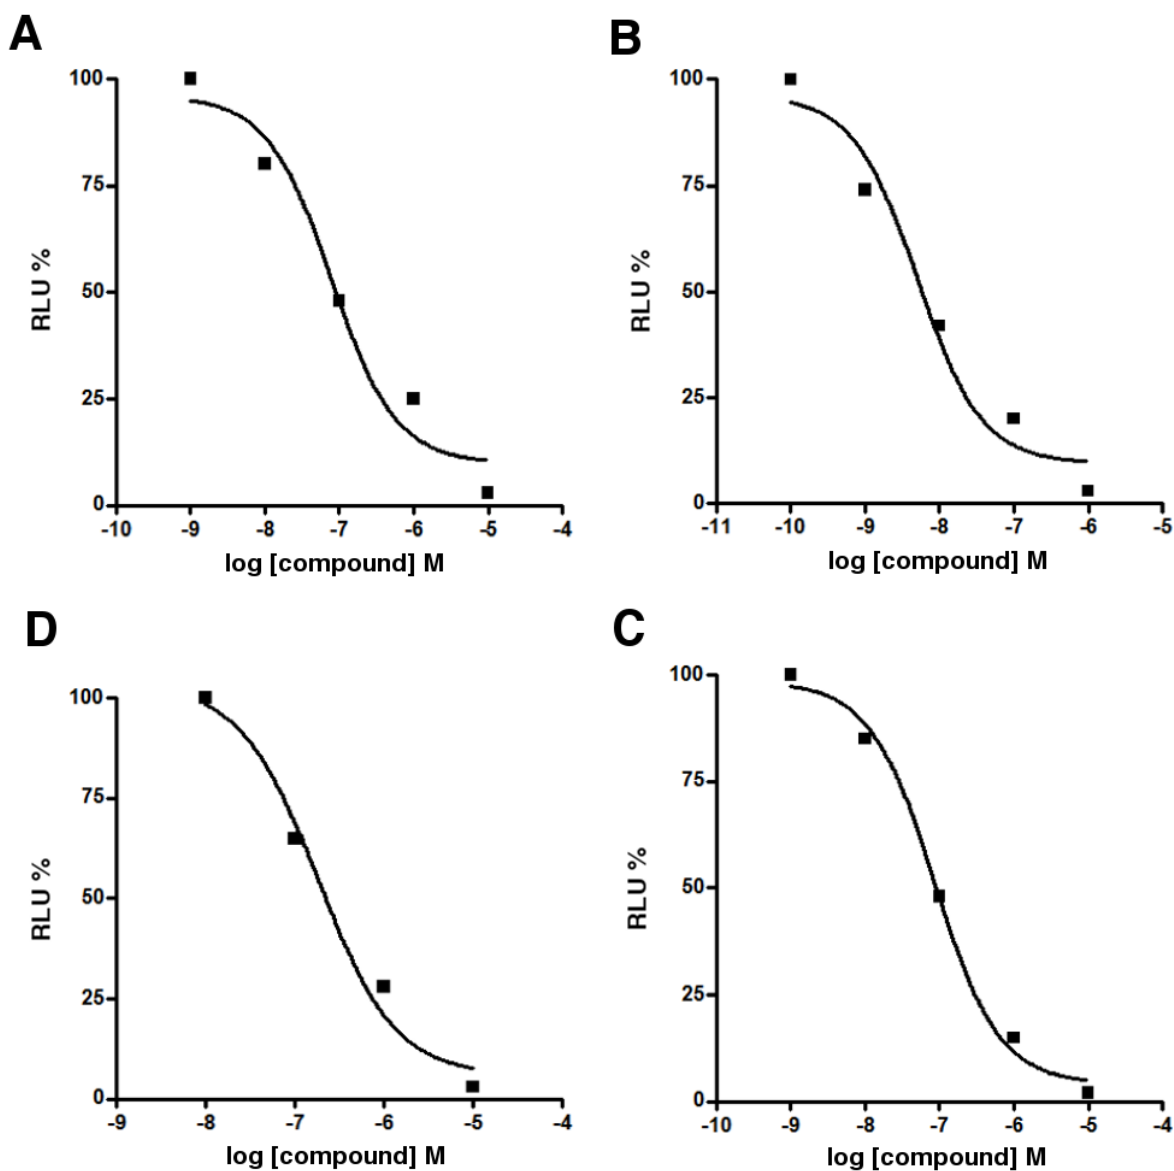

**Supplementary Figure S1.** Functional assay measuring the inhibition of A<sub>2A</sub>AR mediated cAMP production by compounds **5**, **19**, **22**, and **23** (A, B, C, and D, respectively). All the compounds close to completely inhibit the agonist effect of 1  $\mu$ M NECA (a reference A<sub>2A</sub>AR agonist), as expected for competitive antagonism.

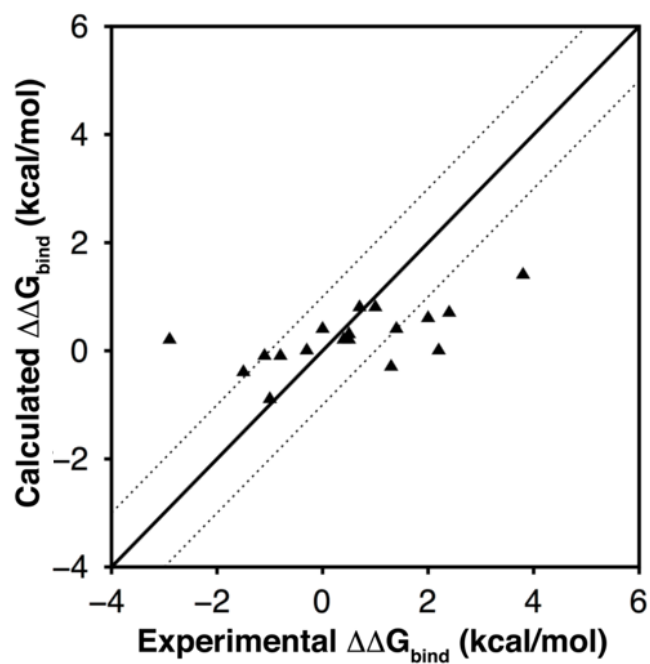

**Supplementary Figure S2.** Comparison of calculated (GLIDE-SP) and experimental relative binding free energies for 18 adenine-derived compound pairs. The solid line represents perfect agreement between calculated and experimental data whereas the dotted lines represent an absolute deviation of 1 kcal/mol.

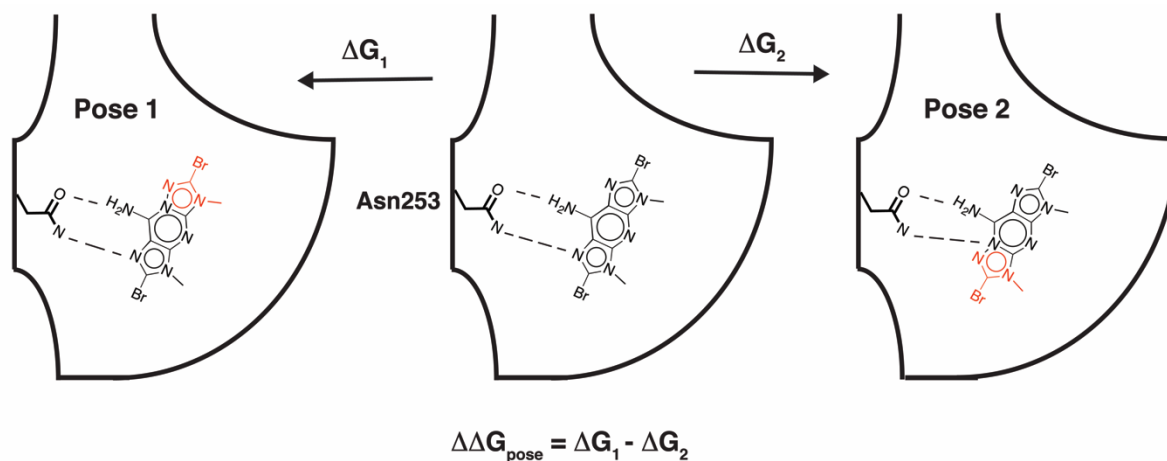

**Supplementary Figure S3.** Evaluation of the relative binding free energy for two alternative binding poses for compound **3**. MD/FEP transformations from the intermediate compound (**24**) to each pose were performed. The atoms that are annihilated from compound **24** in each pose are shown in red.

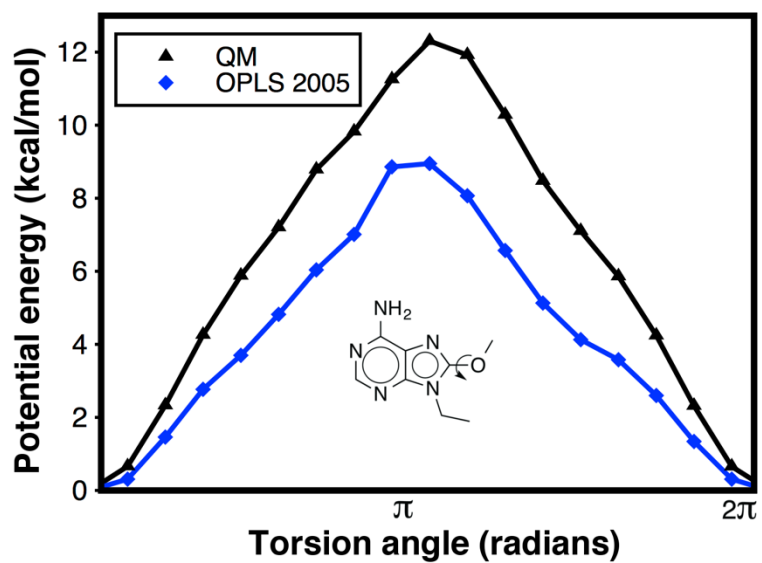

**Supplementary Figure S4.** Potential energy curve for the indicated torsion of compound **21** calculated from using OPLS\_2005 and DFT.

## Supplemental references

1. Lambertucci, C. *et al.* 8-Bromo-9-alkyl adenine derivatives as tools for developing new adenosine A<sub>2A</sub> and A<sub>2B</sub> receptors ligands. *Bioorg Med Chem* **17**, 2812-2822 (2009).
2. Volpini, R. *et al.* Adenosine A<sub>2A</sub> Receptor Antagonists: New 8-Substituted 9-Ethyladenines as Tools for in vivo Rat Models of Parkinson's Disease. *Chemmedchem* **4**, 1010-1019 (2009).
